# Supplementary material
Source: HighWire-hosted journal article supplement (https://www.jneurosci.org/content/41/24/5138)
Supplement: inline-supplementary-material-3 [file inline-supplementary-material-3.xlsx]

## Sheet: Sheet1
			T-Test analysis
	No.	Combinations	Significance level (compared with "tau without heparin")											No.	Combinations	Significance level (compared with "tau with heparin")
			10h	20h	30h	40h	50h	60h	70h	80h	90h					10h	20h	30h	40h	50h	60h	70h	80h	90h
	1	Tau+Hsp70	**	*	**	**	*	*	*	**	*			1	Tau+Hsp70	ns	*	*	**	*	*	*	*	*
	2	Tau+DJ1	***	**	***	*	**	**	**	*	*			2	Tau+DJ1	ns	ns	ns	*		*	**	*	*
	3	Tau+DJ2	*	*	ns	*	**	**	*	**	**			3	Tau+DJ2	*	**	**	***	*	**	*	**	**
	4	Tau+CRBN	**	*	**	*	**	**	*	**	**			4	Tau+CRBN	ns	ns	ns	ns	ns	ns	ns	ns	ns
	5	Tau+Hsp70+DJ1	**	***	**	**	*	*	***	**	*			5	Tau+Hsp70+DJ1	ns	*	*	*	*	**	*	*	*
	6	Tau+Hsp70+DJ2	*	*	**	**	*	**	*	**	*			6	Tau+Hsp70+DJ2	*	**	*	**	*	*	**	***	*
	7	Tau+Hsp70+CRBN	*	*	**	**	*	**	*	**	*			7	Tau+Hsp70+CRBN	ns	ns	*	**	*	*	**	***	*
	8	Tau+DJ1+CRBN	*	**	*	*	**	*	**	*	*			8	Tau+DJ1+CRBN	ns	ns	*	**	*	*	**	***	*
	9	Tau+DJ2+CRBN	**	**	*	*	*	*	*	*	*			9	Tau+DJ2+CRBN	ns	ns	ns	ns	ns	*	ns	ns	ns
	10	Tau+Hsp70+DJ1+CRBN	*	*	**	**	*	**	*	**	*			10	Tau+Hsp70+DJ1+CRBN	ns	**	*	**	*	*	**	***	*
	11	Tau+Hsp70+DJ2+CRBN	*	**	*	*	**	**	*	***	**			11	Tau+Hsp70+DJ2+CRBN	ns	ns	*	*	*	*	*	*	*
	12	Tau+ΔJ_DJ2	ns	*	*	**	*	**	*	*	*			12	Tau+ΔJ_DJ2	**	**	**	*	*	**	*	**	*
	13	Tau+ΔJ_DJ2+Hsp70	ns	*	ns	*	**	*	*	*	*			13	Tau+ΔJ_DJ2+Hsp70	*	*	*	**	**	*	*	*	**
	14	Tau+BSA	**	*	***	*	*	**	*	**	*			14	Tau+BSA	ns	ns	ns	ns	ns	ns	ns	ns	ns
	No.	Combinations	Significance level (compared with "tau without heparin")											No.	Combinations	Significance level (compared with "tau with heparin")
			0.5h	1h	1.5h	2h	2.5h	3.0h	3.5h	4.0h	4.5h					0.5h	1h	1.5h	2h	2.5h	3.0h	3.5h	4.0h	4.5h
	1	Tau+Hsp70	*	*	*	**	**	*	*	*	**			1	Tau+Hsp70	ns	ns	*	*	**	*	*	*	**
	2	Tau+DJ1	**	**	***	**	**	*	*	***	**			2	Tau+DJ1	ns	ns	ns	*	*	***	*	*	*
	3	Tau+DJ2	ns	*	*	*	**	***	*	*	*			3	Tau+DJ2	**	*	***	*	**	*	**	*	**
	4	Tau+CRBN	**	*	**	*	**	*	**	*	*			4	Tau+CRBN	ns	ns	ns	ns	ns	ns	ns	ns	ns
	5	Tau+Hsp70+DJ1	**	**	*	**	**	**	*	*	**			5	Tau+Hsp70+DJ1	ns	ns	*	**	*	*	*	**	*
	6	Tau+Hsp70+DJ2	ns	*	**	**	*	*	**	*	**			6	Tau+Hsp70+DJ2	*	**	**	*	*	**	***	*	*
	7	Tau+Hsp70+CRBN	*	*	*	**	**	*	*	*	*			7	Tau+Hsp70+CRBN	*	**	*	**	*	*	*	**	*
	8	Tau+DJ1+CRBN	*	*	*	*	*	*	*	*	**			8	Tau+DJ1+CRBN	ns	ns	ns	*	**	*	*	*	*
	9	Tau+DJ2+CRBN	**	*	*	*	*	**	*	*	**			9	Tau+DJ2+CRBN	*	*	**	*	*	ns	ns	ns	ns
	10	Tau+Hsp70+DJ1+CRBN	*	*	**	**	*	*	**	*	**			10	Tau+Hsp70+DJ1+CRBN	ns	*	*	*	*	ns	ns	ns	ns
	11	Tau+Hsp70+DJ2+CRBN	*	*	**	**	**	**	**	***	***			11	Tau+Hsp70+DJ2+CRBN	ns	*	*	**	**	*	*	**	*
	12	Tau+ΔJ_DJ2	ns	ns	**	**	*	**	*	*	*			12	Tau+ΔJ_DJ2	*	**	*	**	*	*	*	**	*
	13	Tau+ΔJ_DJ2+Hsp	*	*	*	*	**	***	*	*	*			13	Tau+ΔJ_DJ2+Hsp	*	*	**	*	**	*	*	*	*
	14	Tau+BSA	*	*	**	*	**	*	*	*	**			14	Tau+BSA	ns	ns	ns	ns	ns	ns	ns	ns	ns
	No.	Combinations	Significance level (compared with "tau without heparin")											No.	Combinations	Significance level (compared with "tau with heparin")
			1d	2d	3d	4d	5d	6d	7d	8d	9d					1d	2d	3d	4d	5d	6d	7d	8d	9d
	1	Tau+Hsp70	ns	*	**	**	*	*	*	**	*			1	Tau+Hsp70	ns	ns	*	*	*	*	*	*	*
	2	Tau+DJ1	ns	*	**	*	**	**	*	**	*			2	Tau+DJ1	ns	ns	*	*	*	*	*	*	*
	3	Tau+DJ2	ns	ns	ns	ns	ns	**	*	*	*			3	Tau+DJ2	*	*	**	*	*	***	**	**	*
	4	Tau+CRBN	*	**	*	*	***	*	**	**	**			4	Tau+CRBN	ns	ns	ns	ns	ns	ns	ns	ns	ns
	5	Tau+Hsp70+DJ1	ns	*	**	**	*	**	*	**	*			5	Tau+Hsp70+DJ1	ns	ns	*	*	*	*	*	*	*
	6	Tau+Hsp70+DJ2	ns	ns	ns	ns	*	*	***	**	*			6	Tau+Hsp70+DJ2	**	**	*	*	**	*	***	*	*
	7	Tau+Hsp70+CRBN	ns	**	*	*	**	**	*	***	**			7	Tau+Hsp70+CRBN	ns	*	*	*	*	*	***	ns	ns
	8	Tau+DJ1+CRBN	*	*	**	**	*	**	*	*	*			8	Tau+DJ1+CRBN	ns	**	*	*	**	*	*	*	ns
	9	Tau+DJ2+CRBN	*	*	*	*	**	***	*	*	*			9	Tau+DJ2+CRBN	ns	*	*	*	**	*	*	*	ns
	10	Tau+Hsp70+DJ1+CRBN	*	**	*	*	*	**	*	**	*			10	Tau+Hsp70+DJ1+CRBN	ns	**	*	*	*	*	*	*	*
	11	Tau+Hsp70+DJ2+CRBN	ns	**	*	*	**	**	*	***	**			11	Tau+Hsp70+DJ2+CRBN	ns	*	*	*	*	**	*	*	*
	12	Tau+ΔJ_DJ2	ns	*	**	**	*	**	*	*	*			12	Tau+ΔJ_DJ2	**	**	*	*	**	*	*	*	**
	13	Tau+ΔJ_DJ2+Hsp	ns	*	*	*	**	***	*	*	*			13	Tau+ΔJ_DJ2+Hsp	*	**	**	*	**	*	*	*	*
	14	Tau+BSA	*	**	*	**	*	**	***	**	*			14	Tau+BSA	ns	ns	ns	ns	ns	ns	ns	ns	ns

## Sheet: Sheet2
		ANOVA analysis between different groups
	Group No.	Combinations
	1	Tau+heparin
	2	Tau/Hsp70
	3	Tau/DJ1
	4	Tau/DJ2
	5	Tau/Hsp70/DJ1
	6	Tau/Hsp70/DJ2
	7	Tau/Hsp70/DJ2/CRBN
	8	Tau+ΔJ_DJ2
	9	Tau+Hso+ΔJ_DJ2
	10	Tau+BSA
	11	Tau without heparin
		Groups compared	0.5h		4.0h
			F value	p-value	F value	p-value
		All	2.846	0.0114	3.0026	0.0157
		1,2,3	0.276	0.7635	1.00191	0.42127
		1 to 5	3.0733	0.0194	4.2384	0.0145
		4 to 9	3.435	0.0264	3.146	0.0216
		4 to 11	3.6117	0.0296	2.916	0.0131
